# Supplementary material for: The role of zwitterionic crosslinks in facilitating ion conduction, lithium deposition, and stable interface formation for polymer electrolyte-based lithium metal batteries
Source: Royal Society of Chemistry journal article supplement (doi:10.1039/d4ta02898h), 2024-01-01
Supplement: d4ta02898h1.pdf [file d4ta02898h1.pdf]

## Supplementary Information

### The Role of Zwitterionic Crosslinks in Facilitating Ion Conduction, Lithium Deposition, and Stable Interface Formation for Polymer Electrolyte Based Lithium Metal Batteries

Liang Chai<sup>abc</sup>, Zhiheng Zou<sup>abc</sup>, Zhengsheng Yang<sup>abc</sup>, and Guang Yang<sup>\*abc</sup>

- School of Electronic Science and Engineering, University of Electronic Science and Technology of China, Chengdu, 611731, China
- National Engineering Research Center of Electromagnetic Radiation Control Materials, University of Electronic Science and Technology of China, Chengdu, 611731, China
- Key Laboratory of Multi-spectral Absorbing Materials and Structures of Ministry of Education, University of Electronic Science and Technology of China, Chengdu, 611731, China

E-mail: yg028@uestc.edu.cn

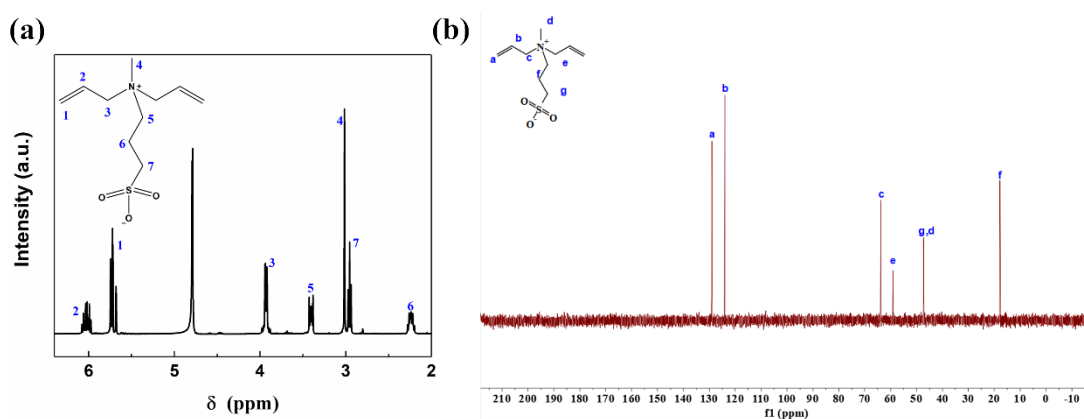

**Fig. S1** (a) <sup>1</sup>H NMR and (b) <sup>13</sup>C NMR spectrum of DMA-SO<sub>3</sub><sup>-</sup> (solvent: D<sub>2</sub>O).

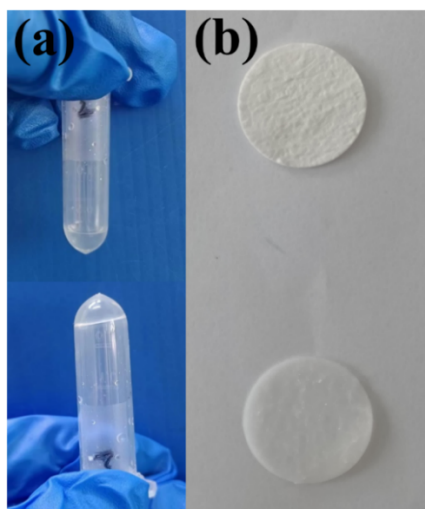

**Fig. S2** (a) Photo images of the precursor solution (top image) and polymer gel after polymerization (bottom image); (b) photo images of glass fiber membrane (top image) and ZGE (bottom image).

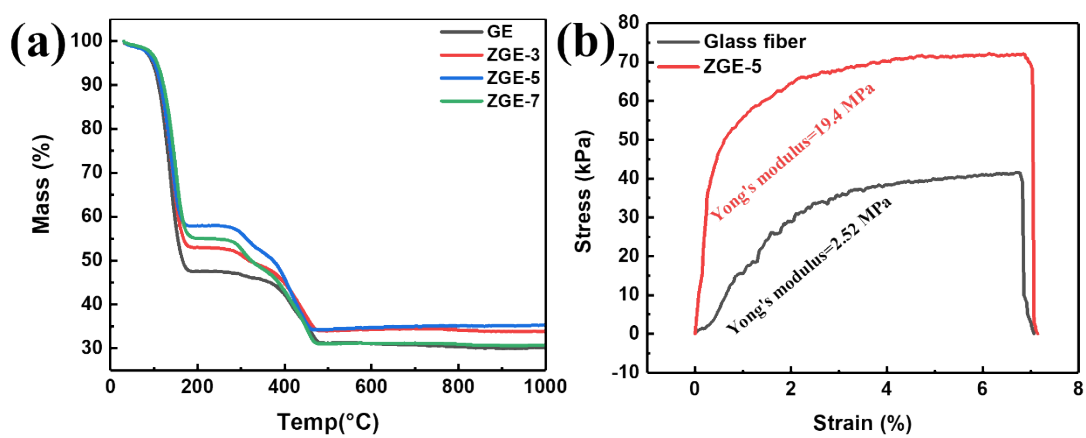

**Fig. S3** (a) TG diagrams of GE, ZGE-3, 5 and 7; (b) stress-strain curves for glass fibers and ZGE-5.

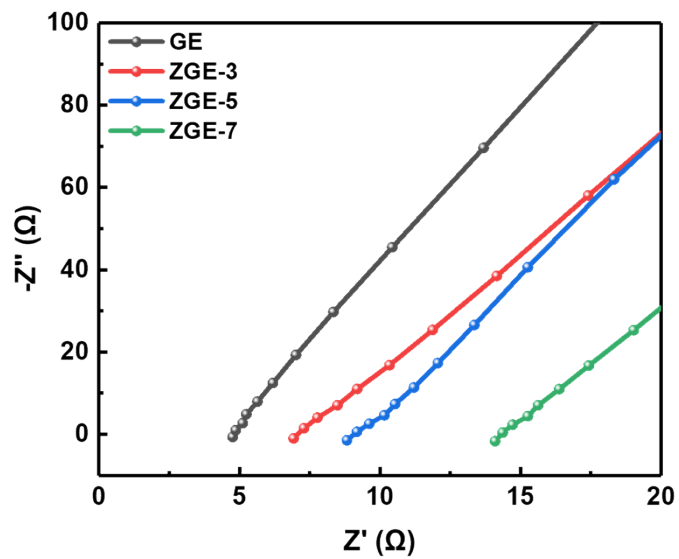

**Fig. S4** Electrochemical impedance spectroscopy of the GE, ZGE-3, 5 and 7 at 30°C.

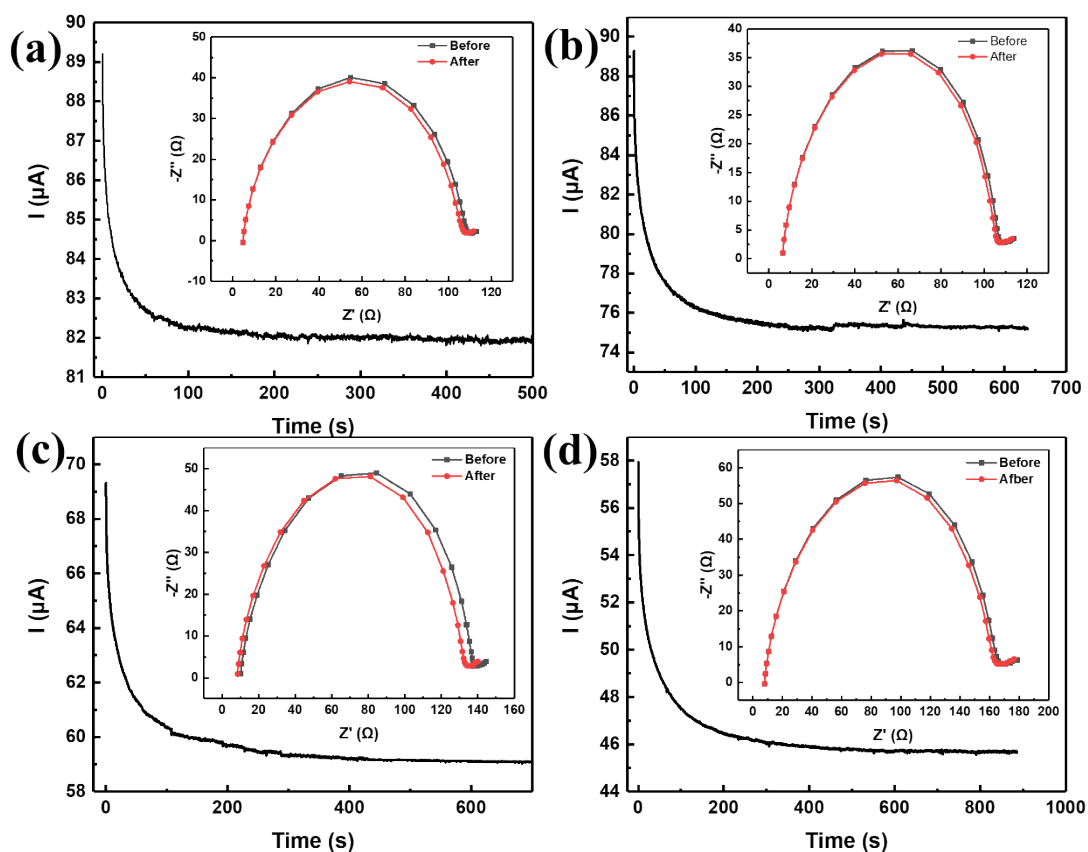

**Fig. S5** Chronoamperometry before and after polarization for Li symmetric cells with electrolytes of (a) GE, (b) ZGE-3, (c) 5 and (d) 7 at 30°C.

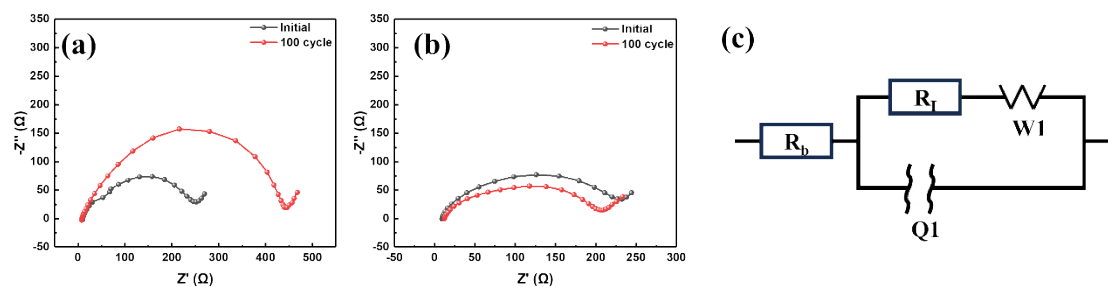

**Fig. S6** The Nyquist plots of Li/Li cells with (a) GE and (b) ZGE-5 before and after 100 plating/stripping cycles; (c) the EIS fitted equivalent circuit ( $R_b$  is the body impedance,  $R_l$  is the interface impedance,  $W1$  is the Warburg impedance and  $Q1$  is the constant phase element).

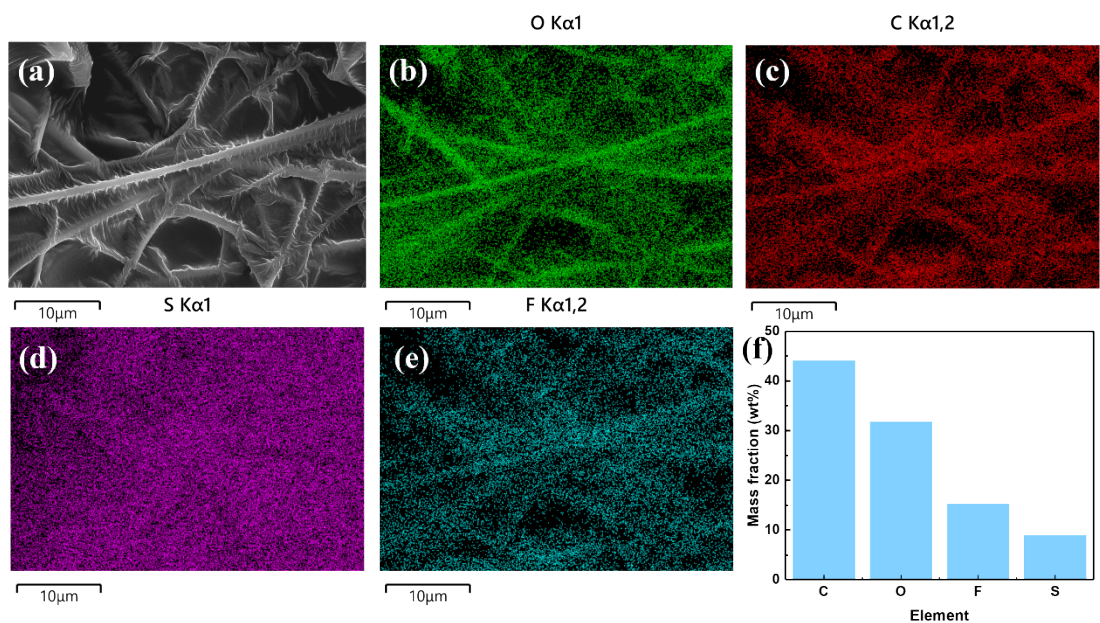

**Fig. S7** (a) SEM image of ZGE-5. EDS mapping of (b)O, (c) C, (d) S, and (e)F on the surface of ZGE-5; (f)element content on the surface of ZGE-5.

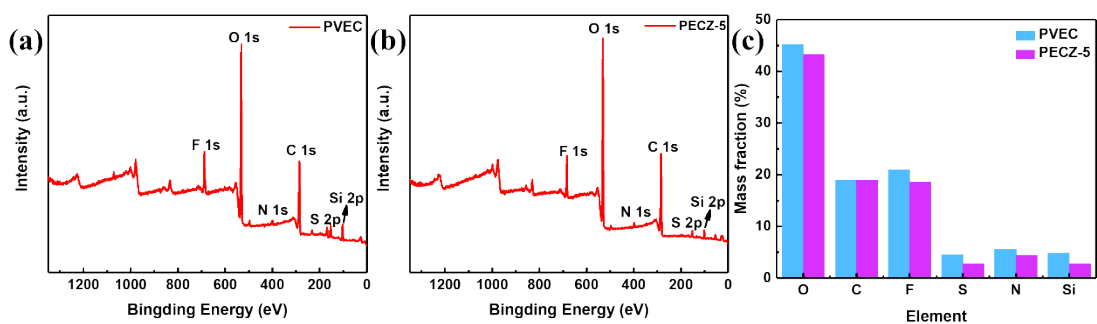

**Fig. S8** XPS full spectra of lithium surface of (a) GE and (b) ZGE-5 lithium symmetric cell after 100 cycles of plating/stripping tests; (c) the proportion of each element on the lithium surface of the lithium symmetric cell of GE and ZGE-5 after 100 cycles of plating/stripping tests.

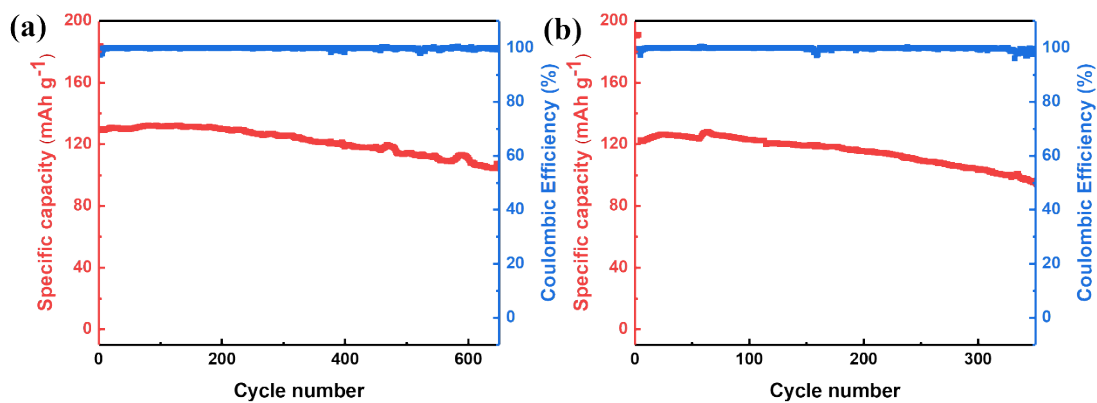

**Fig. S9** Cycling performance of Li/ZGE-5/LiFePO<sub>4</sub> cell at (a) 2 C and (b) 3 C (Cycle performance tests were all done at 30°C).

|       | DMA-SO <sub>3</sub> <sup>-</sup><br>(wt%) | VEC<br>(wt%) | PEGDMA<br>(wt%) | HMPP<br>(wt%) | 1 M LiTFSI in FEC/DMC<br>(1:4, v/v) (wt%) |
|-------|-------------------------------------------|--------------|-----------------|---------------|-------------------------------------------|
| GE    | 0                                         | 16           | 2               | 2             | 80                                        |
| ZGE-3 | 3                                         | 16           | 2               | 2             | 77                                        |
| ZGE-5 | 5                                         | 16           | 2               | 2             | 75                                        |
| ZGE-7 | 7                                         | 16           | 2               | 2             | 73                                        |

**Table S1.** Content of each component in the polymerization precursor solution
